# Supplementary material for: Co-Delivery of a Novel Lipidated TLR7/8 Agonist and Hemagglutinin-Based Influenza Antigen Using Silica Nanoparticles Promotes Enhanced Immune Responses
Source: MDPI journal article supplement (doi:10.3390/pharmaceutics16010107), 2024-01-13
Supplement: s1 [file s1]

## Co-Delivery of a Novel Lipidated TLR7/8 Agonist and Hemagglutinin-based Influenza Antigen Using Silica Nanoparticles Promotes Enhanced Influenza-Specific Immune Responses

Walid M. Abdelwahab<sup>1,2</sup>, Sarah Auclair<sup>1,2</sup>, Timothy Borgogna<sup>1,2</sup>, Karthik Siram<sup>1,2</sup>, Alexander Riffey<sup>1,2</sup>, Hélène G. Bazin<sup>3</sup>, Howard B. Cottam<sup>4</sup>, Tomoko Hayashi<sup>4</sup>, Jay T. Evans<sup>1,2,3</sup>, David J. Burkhart<sup>1,2,3\*</sup>

<sup>1</sup>Center for Translational Medicine, <sup>2</sup>Department of Biomedical and Pharmaceutical Sciences, University of Montana, 32 Campus Drive, Missoula, MT 59802, <sup>3</sup>Inimmune Corporation, 1121 East Broadway, Missoula, MT 59812, <sup>4</sup>Moore's Cancer Center, University of California San Diego, La Jolla, CA 92093-0809

**Table S1. Reagents used in ELISA**

| Reagents                               | Dilution factor | Source                   | Catalog #  |
|----------------------------------------|-----------------|--------------------------|------------|
| <i>Capture antibodies</i>              |                 |                          |            |
| Purified rat anti-mouse TNF $\alpha$   | 125             | Thermo Fisher Scientific | 14-7325-85 |
| Purified rat anti-mouse IL-12 p40/p70  | 200             | BD Biosciences           | 551219     |
| Purified rat anti-mouse IL-6           | 100             | BD Biosciences           | 554400     |
| <i>Detecting antibodies</i>            |                 |                          |            |
| Biotin mouse anti- mouse TNF $\alpha$  | 250             | Thermo Fisher Scientific | 14-7325-86 |
| Biotin rat anti-mouse IL-12 p40/p70    | 1000            | BD Biosciences           | 554476     |
| Biotin rat anti-mouse IL-6             | 1000            | BD Biosciences           | 554402     |
| <i>Other reagents</i>                  |                 |                          |            |
| Streptavidin, HRP                      | 1000            | Thermo Fisher Scientific | 43-4323    |
| KPL SureBlue™ TMB Peroxidase Substrate |                 | Seracare                 | 5120-0077  |

**Table S2. Description and adjuvant coating density of the initial INI-4001/A-SNP formulations**

| Formulation            | A-SNP Conc.<br>(mg/mL) | INI-4001 Conc.<br>( $\mu$ M) | INI-4001 coating density<br>nmol/cm <sup>2</sup> |
|------------------------|------------------------|------------------------------|--------------------------------------------------|
| 50 nm INI-4001/A-SNP   | 4.0                    | 234                          | 0.05                                             |
| 100 nm INI-4001/A-SNP  | 4.0                    | 203                          | 0.09                                             |
| 200 nm INI-4001/A-SNP  | 4.0                    | 232                          | 0.21                                             |
| 1500 nm INI-4001/A-SNP | 4.0                    | 159                          | 1.05                                             |

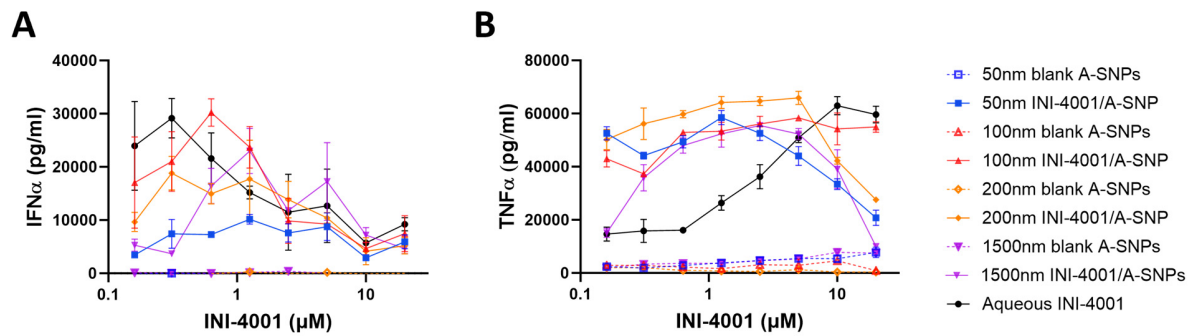

**Figure S1. Cytokine response of human PBMCs exposed to INI-4001/A-SNP formulations of various sizes (50, 100, 200, and 1500 nm) for 24 h.** Cell culture supernatants were analyzed by ELISA for the presence of IFN $\alpha$  (A) as a primary readout for TLR7 activation and TNF $\alpha$  (B) as readout for TLR8 activation. Data is the average of two experiments from one representative donor.

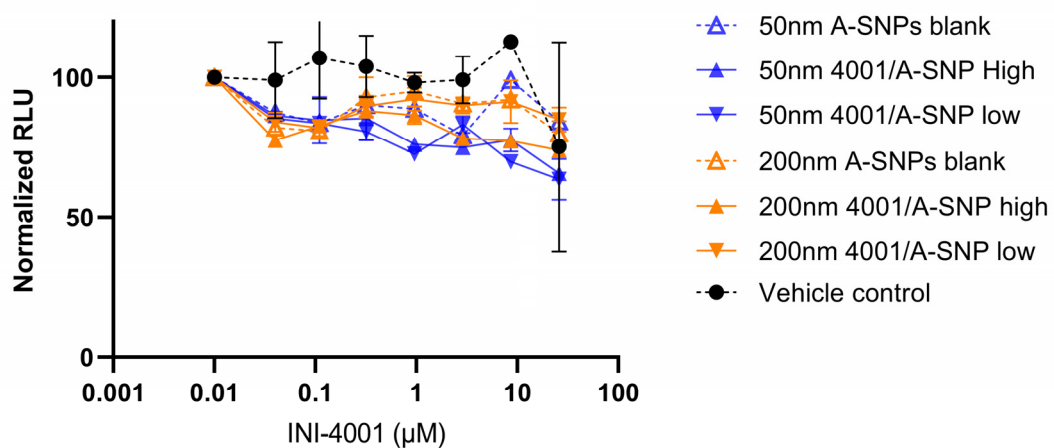

**Figure S2. Effect of INI-4001/A-SNP formulations on viability of human PBMCs.** PBMCs were cultured with serially diluted SNP formulations for 24 hours and cell viability determined using the CellTiter Glo assay system. Viability is expressed as percent relative luminescent units (RLU) compared to PBMCs incubated 24 hours without the formulations. Data shown as mean  $\pm$  SD of 3 independent experiments. Color should be used in print.

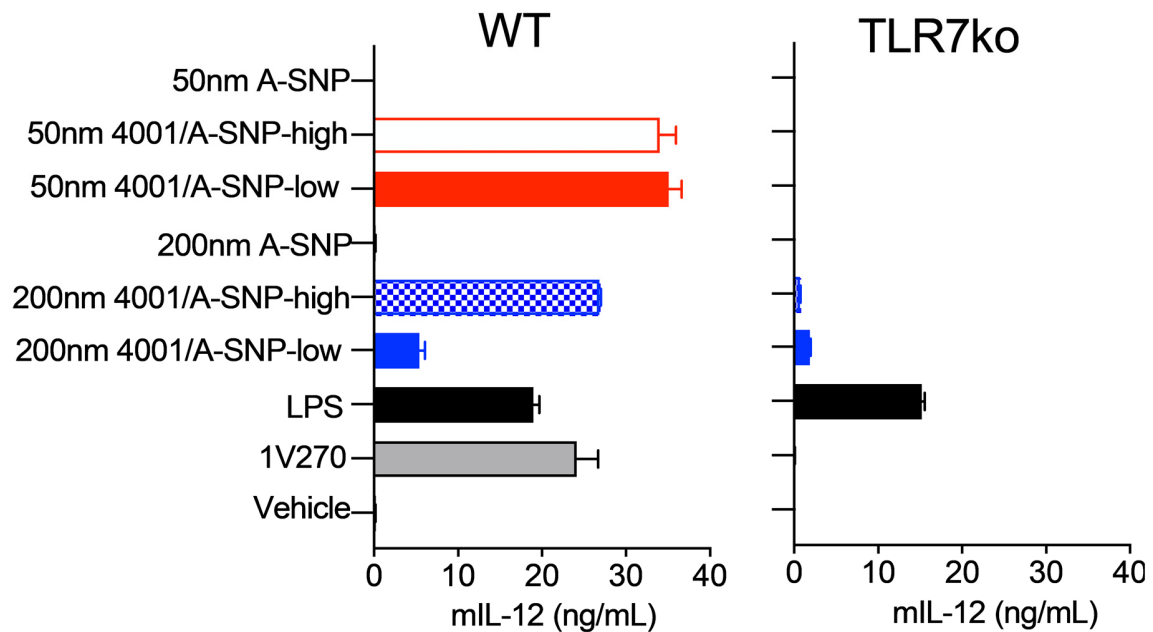

**Figure S3.** IL-12 release by 50, and 200nm INI-4001/A-SNP in TLR7 deficient mBMDC. Wild type and TLR7 deficient mBMDC were incubated with the formulations overnight, and IL-12 release was determined by ELISA. A/SNP alone, LPS, and 1V270 (TLR7 ligand) served as controls.

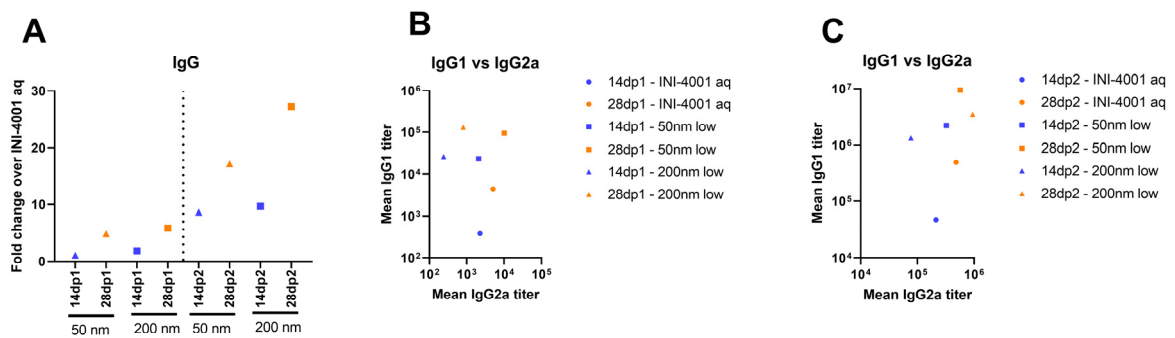

**Figure S4:** (A) Ratio of H7-specific antibody titers of the 50 and 200 nm low-density INI-4001/A-SNP formulations over the INI-4001 aqueous control 14 vs 28 days post primary or secondary vaccination. Scatter plot of the mean values of the IgG2a titers (X-axis) and IgG1 (Y-axis) for each formulation post-primary (B) or post-secondary (C) immunization was generated to show the adjuvant potency distribution.
